# Supplementary material
Source: HighWire-hosted journal article supplement (https://jech.bmj.com/content/76/9/792)
Supplement: inline-supplementary-material-1 [file inline-supplementary-material-1.pdf]

### **Online supplemental material 1. Data sources and ICD-10 codes for cancer types related to smoking included in this study**

We obtained national tabulated data on the numbers of deaths from cancer in Australia from 1955 to 2019 by sex, age and calendar year from the World Health Organization's Mortality Database<sup>1</sup> sourced from the Australian Institute of Health and Welfare.<sup>2</sup> In Australia, it is mandatory for each state and territory to record all deaths in registries administered by the state and territory Registries of Births, Deaths and Marriages, and either a medical practitioner or a coroner is required to certify the cause of death.<sup>3</sup> For the purposes of our analyses, the cancer mortality data were aggregated into 5-year age groups and 5-year calendar periods. All age-standardised rates were standardised to the 2001 Australian population.

Australian population data by sex, 5-year age group and calendar year from 1955 to 2044 (Series B, based on medium population growth) were obtained from the Australian Bureau of Statistics (ABS).<sup>4,5</sup> Smoking data for 1945-2004 were obtained from the International Smoking Statistics Web Edition, which provides data from several different surveys and information on annual tobacco sales,<sup>6</sup> and the National Drug Strategy Household Survey (NDSHS) data for 2007-2019.<sup>7</sup> Detailed descriptions of the data sources for smoking exposure can be found in our recent report on lung cancer mortality in Australia.<sup>8</sup> In brief, sex-age-period-specific smoking prevalence and cigarette tar exposure per capita in Australia were re-constructed backwards to 1920 and forwards to 2044.<sup>8</sup>

**Table S1. ICD-10 codes for cancer types related to smoking included in this study**

| <b>Cancer</b>                             | <b>ICD10</b>     |
|-------------------------------------------|------------------|
| <b>&gt;30% of cases caused by smoking</b> |                  |
| Lung                                      | C33-C34          |
| Larynx                                    | C32              |
| Bladder                                   | C67              |
| Lip, oral cavity and pharynx              | C00-C14, C30-C31 |
| Oesophagus                                | C15              |
| <b>8-30% of cases caused by smoking</b>   |                  |
| Stomach                                   | C16              |
| Liver                                     | C22              |
| Gallbladder and biliary tract             | C23-C24          |
| Pancreas                                  | C25              |
| Colon and rectum                          | C18-C20, C26.0   |
| Kidney and ureter                         | C64-C66          |
| Myeloid Leukaemia                         | C92              |
| Cervix                                    | C53              |
| Uterus                                    | C54-C55          |
| Ovary                                     | C56              |

**References:**

1. World Health Organization. WHO Mortality database, 2021.
2. Australian Institute of Health and Welfare (AIHW). Cancer data in Australia. Cat. no: CAN 122. 8 June 2021 ed, 2021.
3. Australian Bureau of Statistics. Causes of Death, Australia methodology. Catalogue No. 3303.0, 2021.
4. Australian Bureau of Statistics. Australian Historical Population Statistics. cat. no. 3105.0.65.001, 2014.
5. Australian Bureau of Statistics. Population Projections, Australia, 2017 (base) to 2066. cat. no. 3222.0 2021 [updated 22 Nov 2018. Available from: <https://www.abs.gov.au/statistics/people/population/population-projections-australia/latest-release>.
6. Forey B, Hamling J, Hamling J, et al. International smoking statistics (web edition): a collection of worldwide historical data, Methods.: P N Lee Statistics & Computing Ltd; 2016 [19 Dec 2016:[Available from: [http://www.pnlee.co.uk/Downloads/ISS/ISS-Methods\\_161219.pdf](http://www.pnlee.co.uk/Downloads/ISS/ISS-Methods_161219.pdf) accessed 20 Oct 2021.
7. Australian Institute of Health and Welfare (AIHW). Our data collections: National Drug Strategy Household Survey. Available from <https://www.aihw.gov.au/about-our-data/our-data-collections/national-drug-strategy-household-survey>. Last accessed 4 Feb 2021, 2020.
8. Luo Q, Yu XQ, Wade S, et al. Lung cancer mortality in Australia: Projected outcomes to 2040. *Lung Cancer* 2018;125:68-76. doi: <https://doi.org/10.1016/j.lungcan.2018.09.001>
